# Supplementary material for: Modification strategies for cellulose-based anion exchange membranes
Source: Royal Society of Chemistry journal article supplement (doi:10.1039/d5gc00844a), 2025-01-01
Supplement: d5gc00844a1.pdf [file d5gc00844a1.pdf]

## Modification strategies for cellulose-based anion exchange membranes

Chen Cheng <sup>†a</sup>, Siyuan Zhu <sup>†a,b</sup>, Chichong Lu<sup>\*c</sup>, Zhichuan J. Xu<sup>\*a</sup>

<sup>a</sup> School of Materials Science and Engineering, Nanyang Technological University, Singapore.

Email: [xuzc@ntu.edu.sg](mailto:xuzc@ntu.edu.sg)

<sup>b</sup> School of Energy Storage Science and Engineering, North China University of Technology,  
Beijing 100048, China.

<sup>c</sup> Department of Chemistry, College of Light Industry Science and Engineering, Beijing  
Technology and Business University, Beijing 100048, China. Email: [luchichong@btbu.edu.cn](mailto:luchichong@btbu.edu.cn)

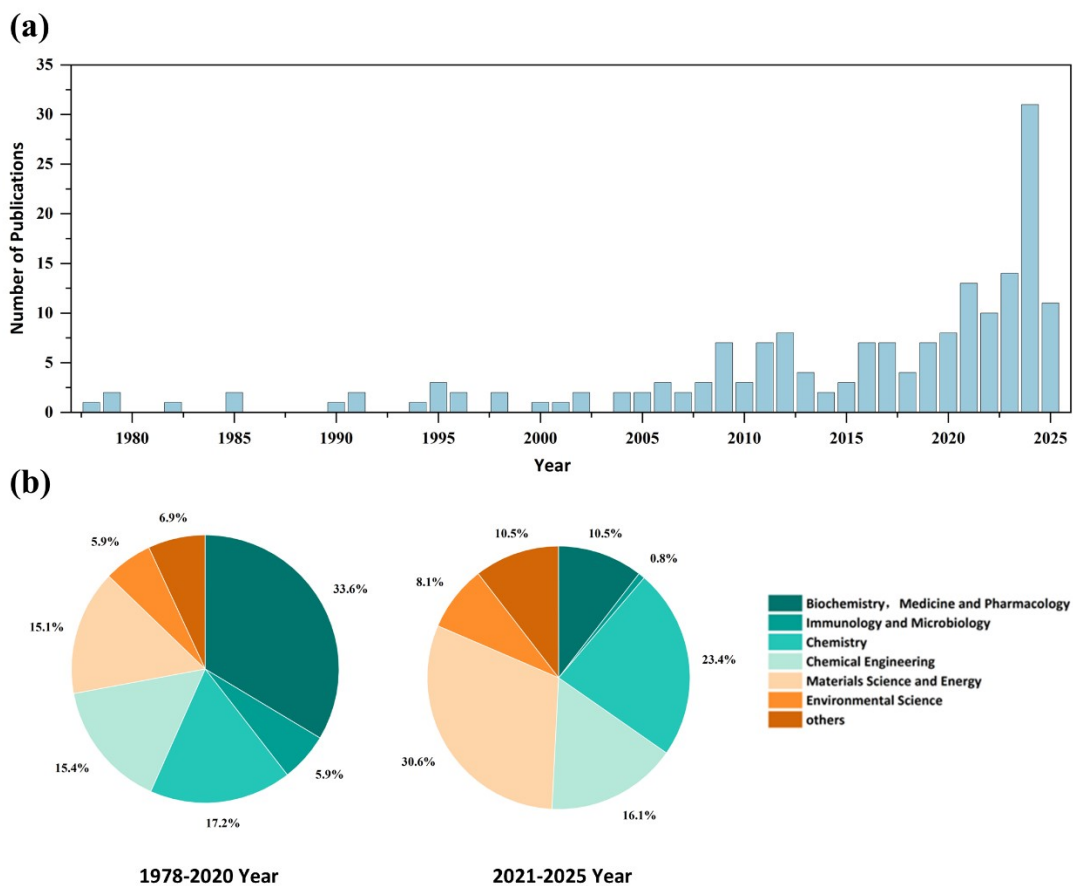

Fig. S1 (a) Number of research publications related to cellulose-based AEMs from 1978 to 2025; (b) proportional distribution of research publications on cellulose-based AEMs across disciplinary fields during the temporal period surrounding 2021. (Source: SciFinder website)
